# Supplementary material for: Function annotation of the rice transcriptome at single-nucleotide resolution by RNA-seq
Source: HighWire-hosted journal article supplement (doi:10.1101/gr.106120.110), 2010-07-13
Supplement: Binder1.pdf [file Binder1.pdf]

Figure S1

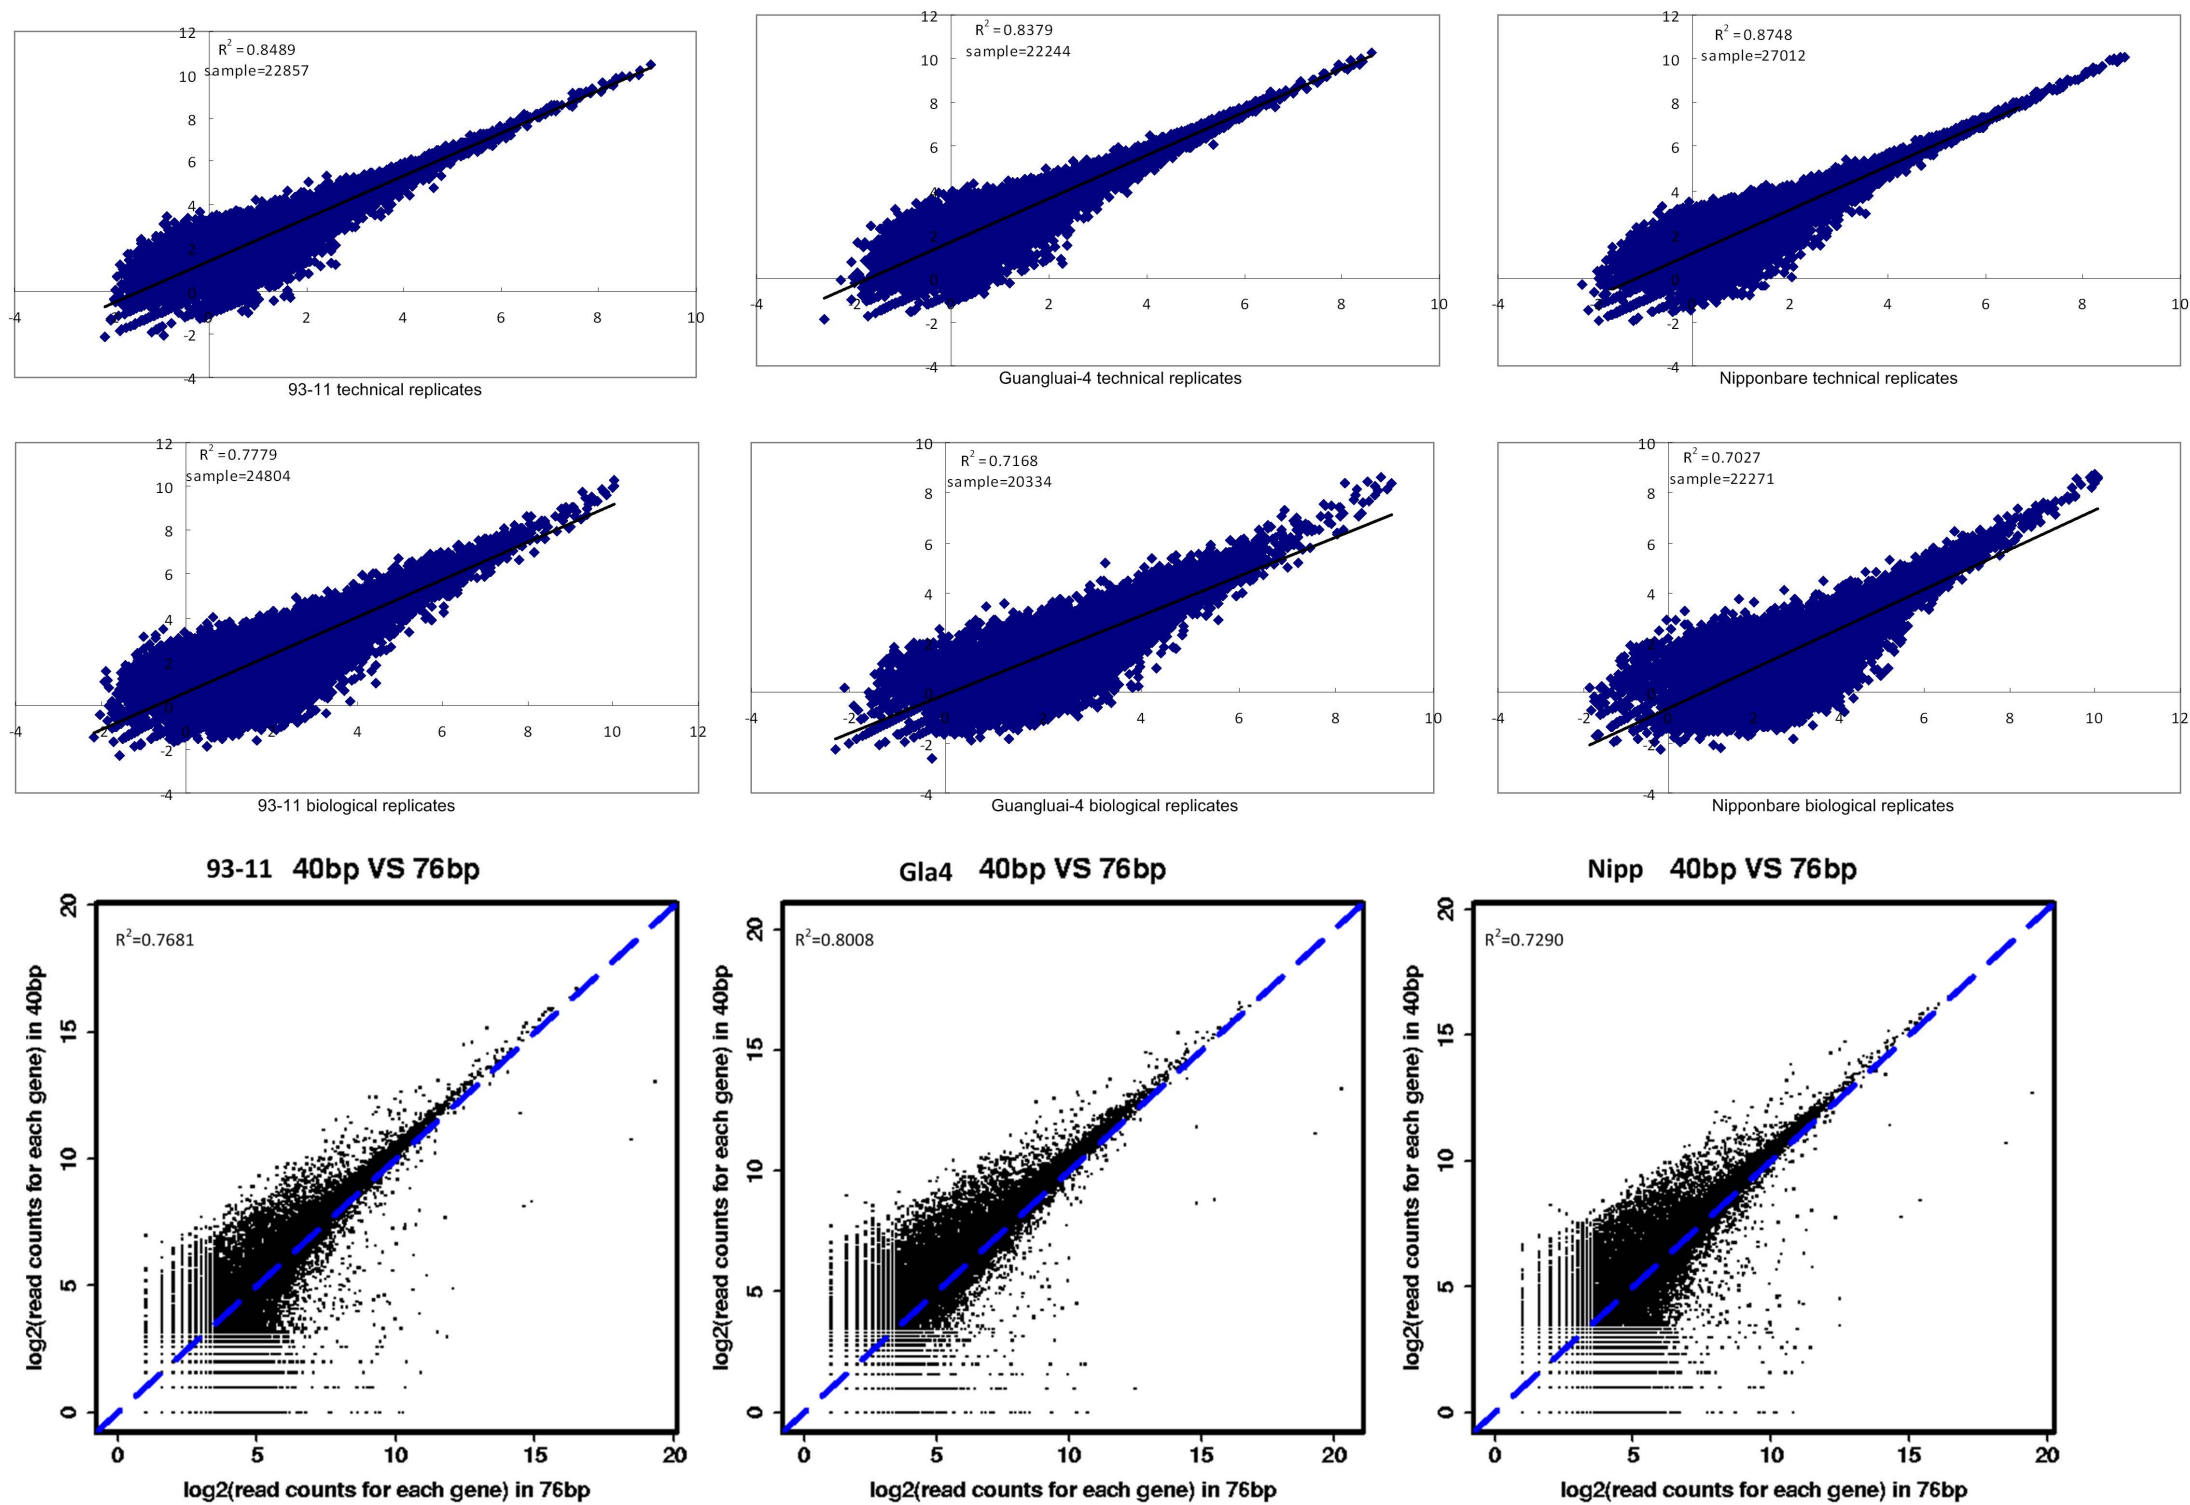

# Figure S2

A

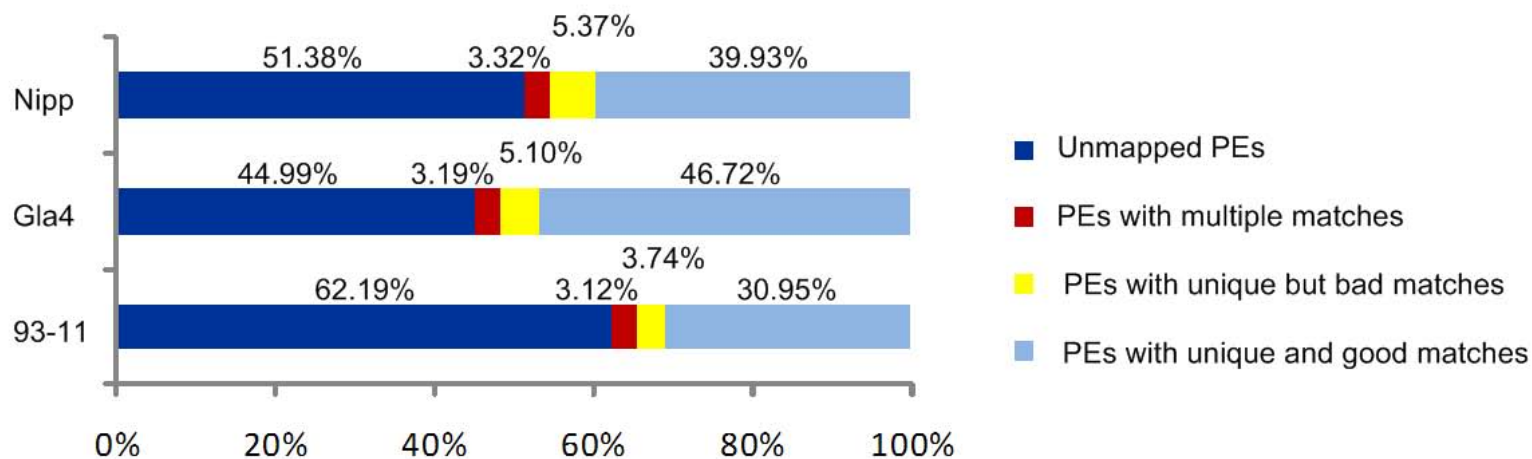

B

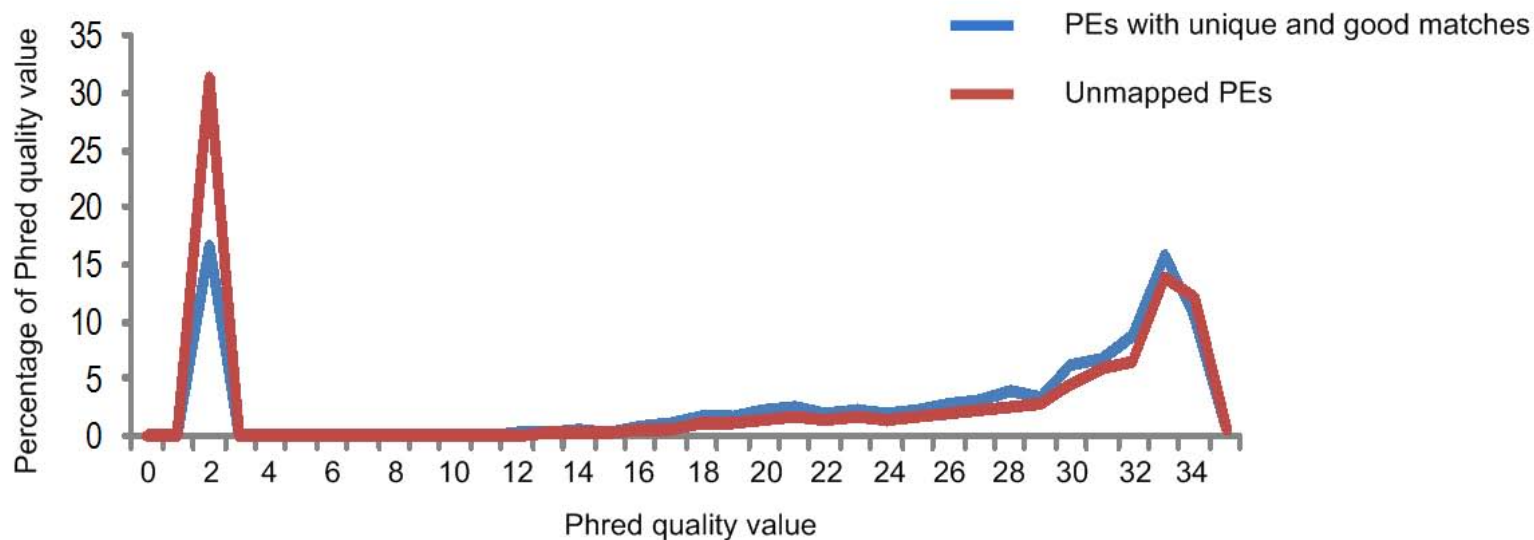

# Figure S3

## A

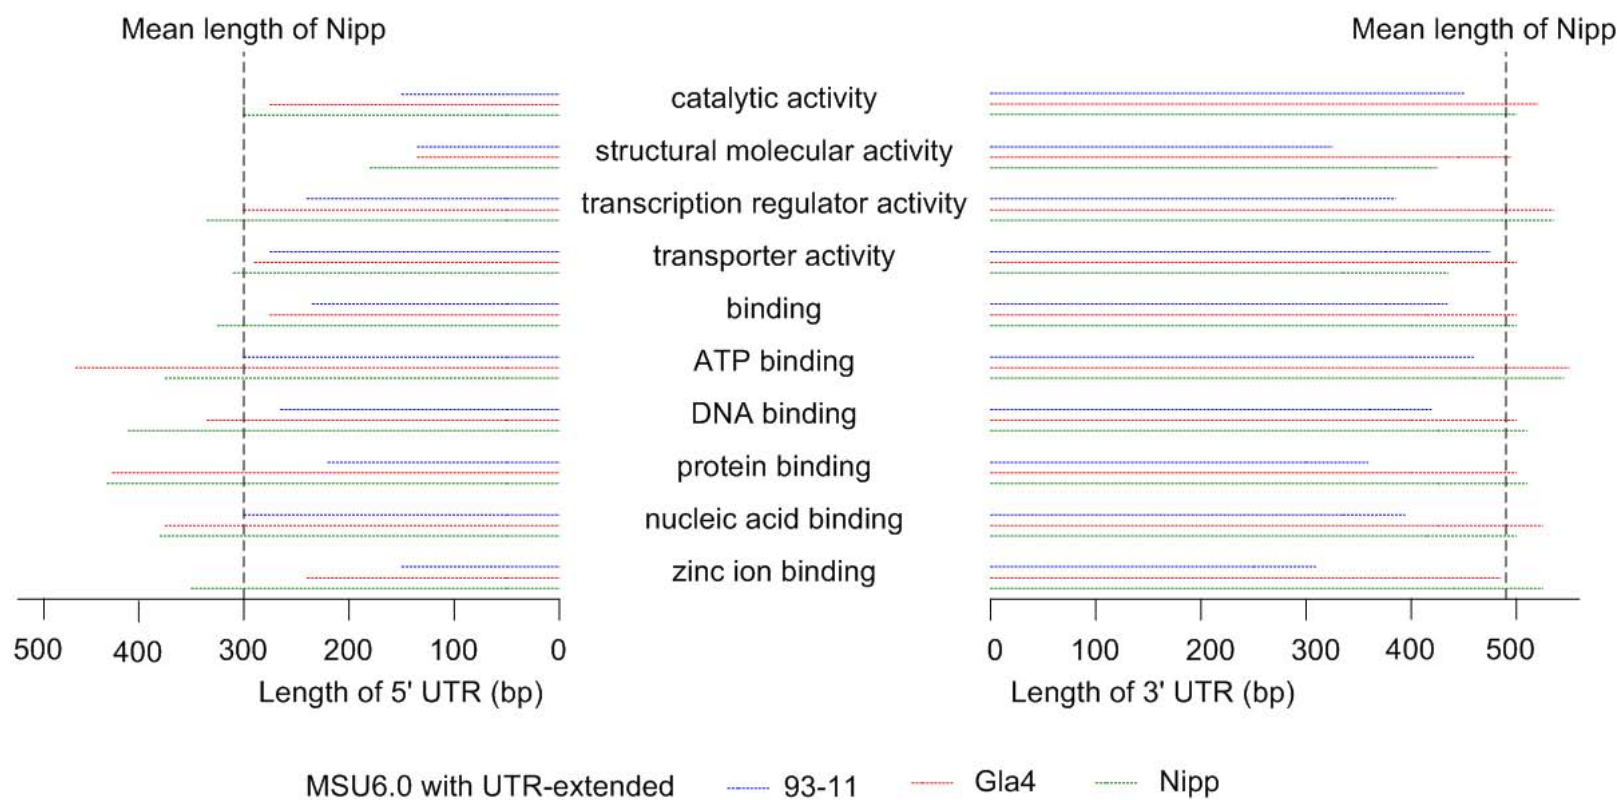

## B

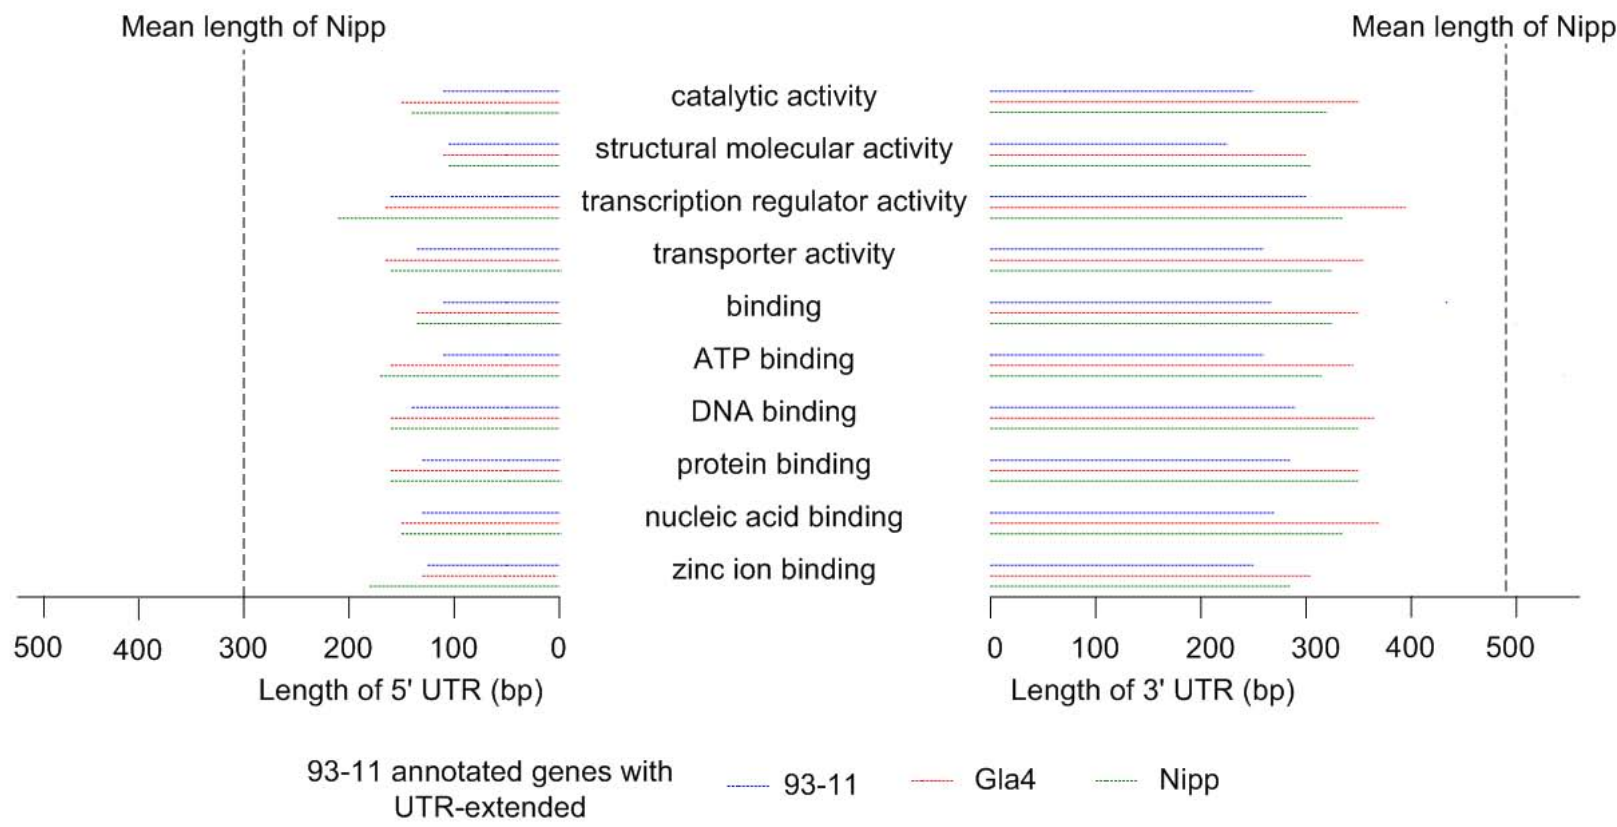

# Figure S4

**A**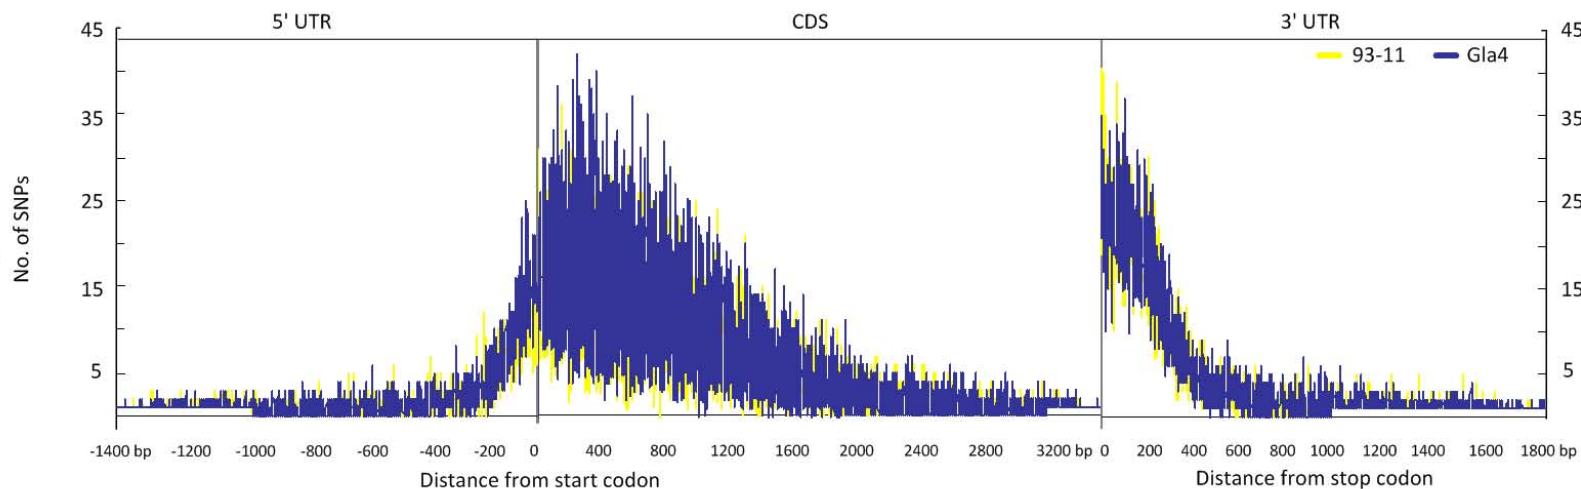**B**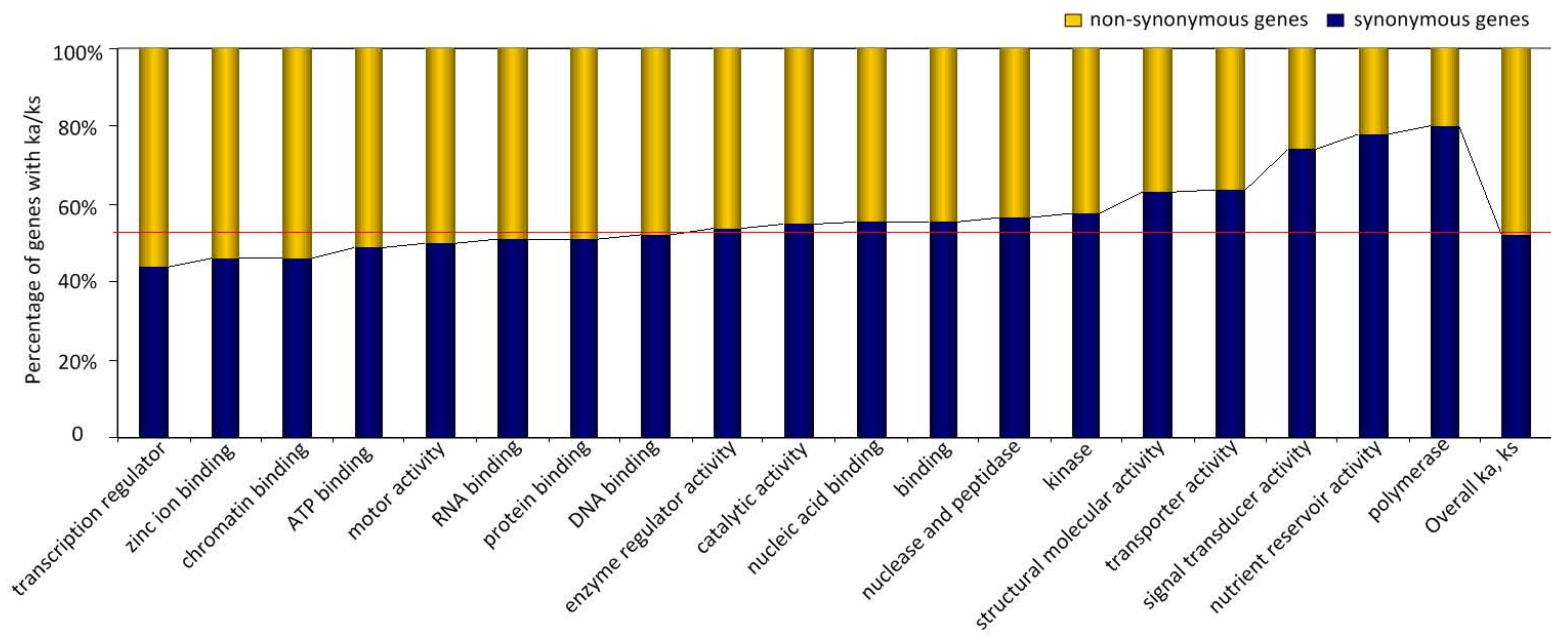

**Supplementary Figure 1.** Scatterplots comparing gene expression scores based on technical replicates, biological replicates and 40bp versus 76bp of 93-11, Guangluai 4 and Nipponbare, respectively.

**Supplementary Figure 2.** (A) Overall mapping results of paired-end reads (PE) referring to the *indica* 93-11 genome sequence. (B) Statistical analysis of each Phred quality value of PEs with uniquely mapped reference and unmapped PEs.

**Supplementary Figure 3.** (A) MSU v6.0 transcripts with significantly larger or smaller UTRs for GO categories based on RNA-seq data of 93-11, Guangluai 4 and Nipponbare are shown. (B) 93-11 annotated gene models with significantly larger or smaller UTRs for GO categories based on the RNA-seq data of 93-11, Guangluai 4 and Nipponbare are shown.

**Supplementary Figure 4.** Summary of identified SNPs. (A) SNP density across UTR regions and coding sequence. (B) Synonymous and non-synonymous SNP distribution in 19 major protein molecular functions.
